# Supplementary material for: Distinguishing African bovids using Zooarchaeology by Mass Spectrometry (ZooMS): New peptide markers and insights into Iron Age economies in Zambia
Source: PLOS journal article supplement (doi:10.1371/journal.pone.0251061), 2021-05-18

## S1 Fig: MALDI-TOF Spectra from the Bovids

The following pages contain one example spectra from each of the species used in the study. Each subfamily has a page with grouped spectra and then each individual has a peak picked spectra individually. The first spectra in the grouped spectra for each subfamily is always *Bos taurus* (Bovinae) for easy comparison to a previously published species.

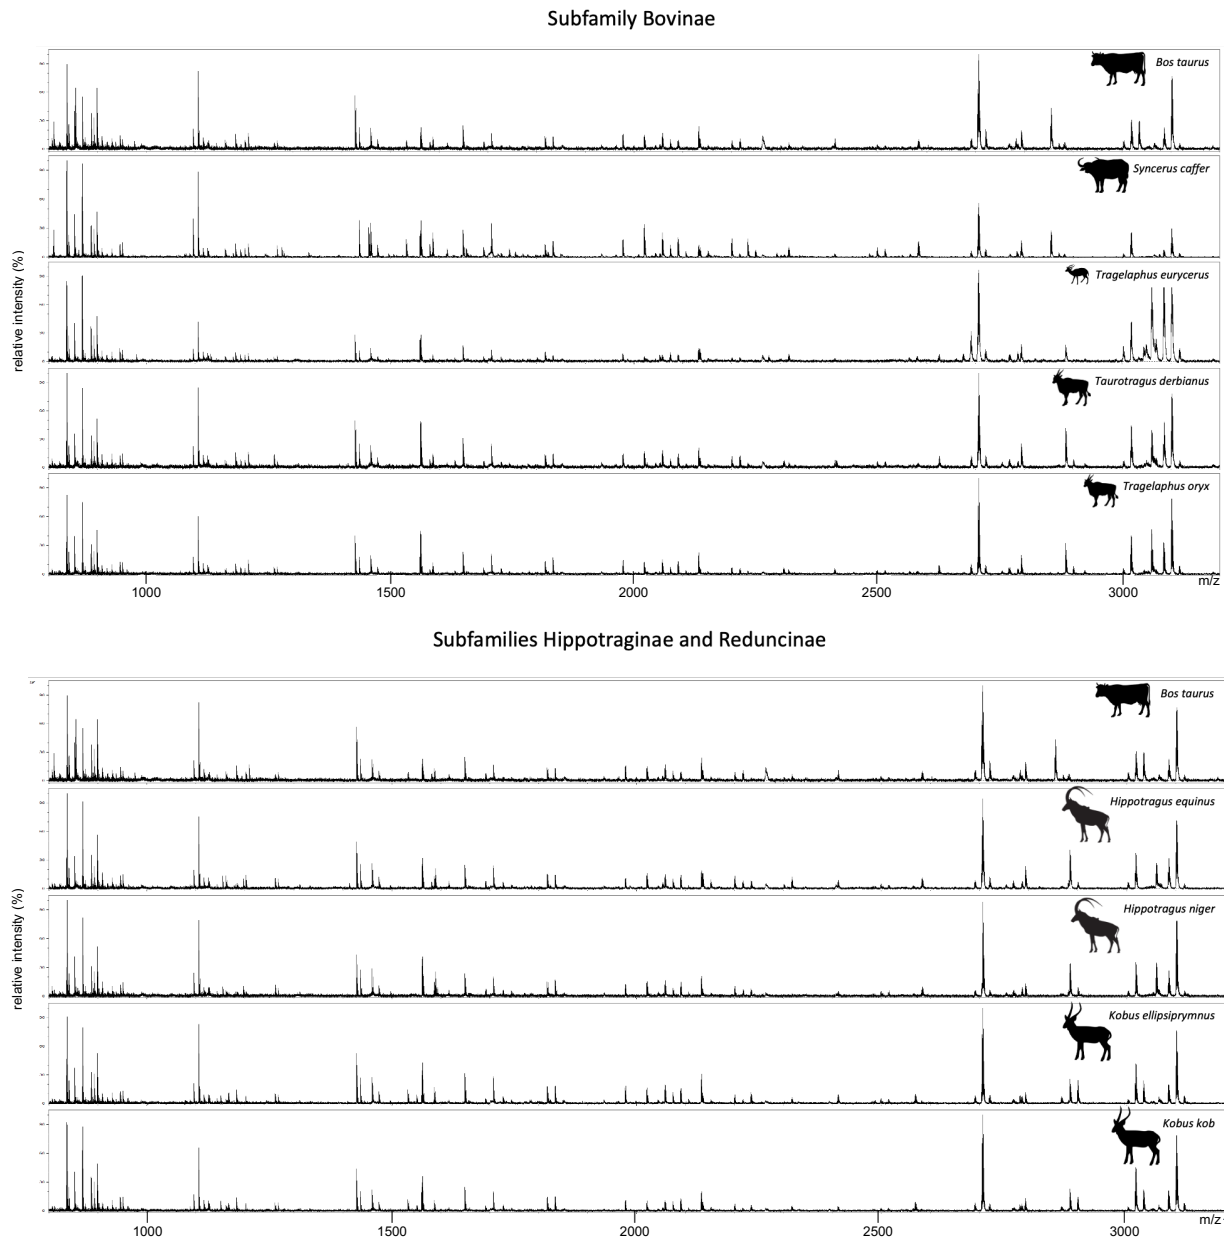

### Subfamily Alcelaphinae

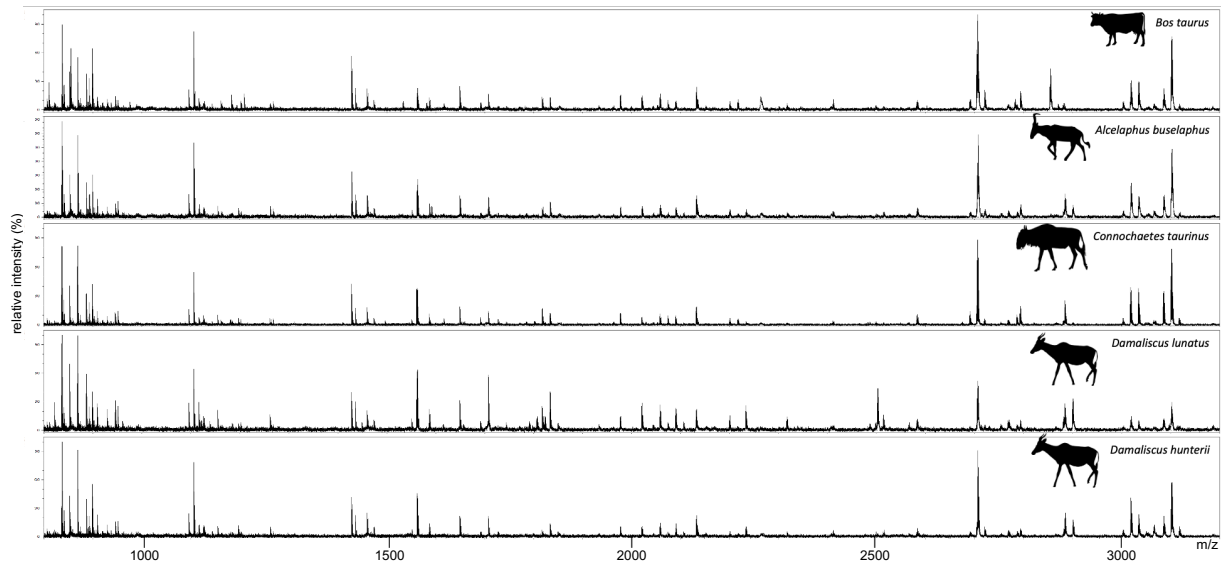

### Subfamily Cephalophinae

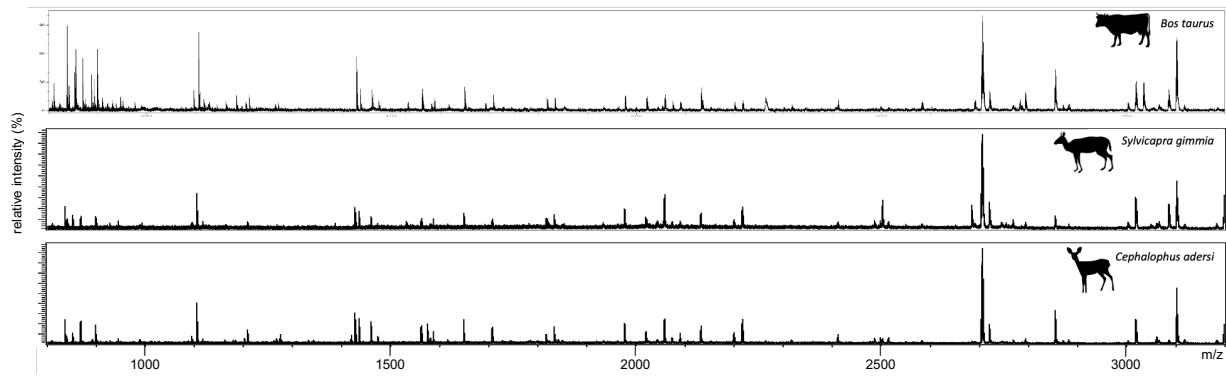

### Subfamily Antilopinae

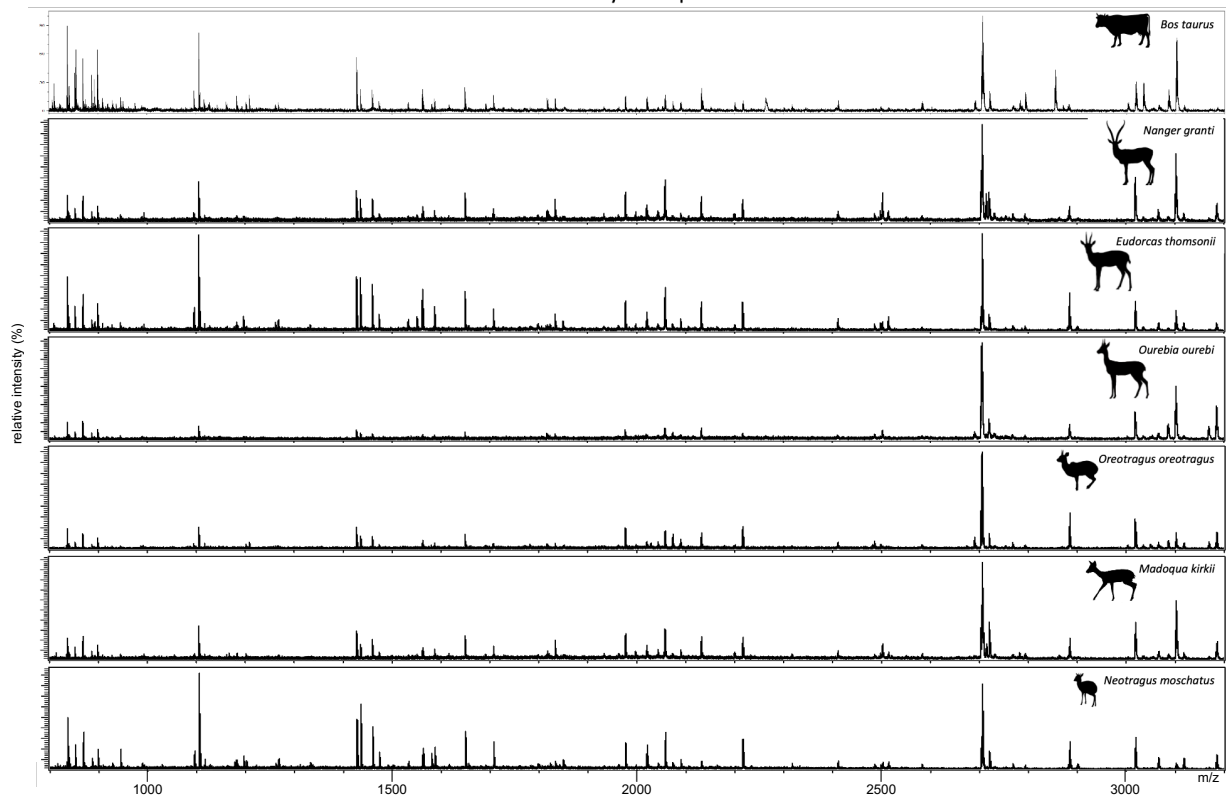

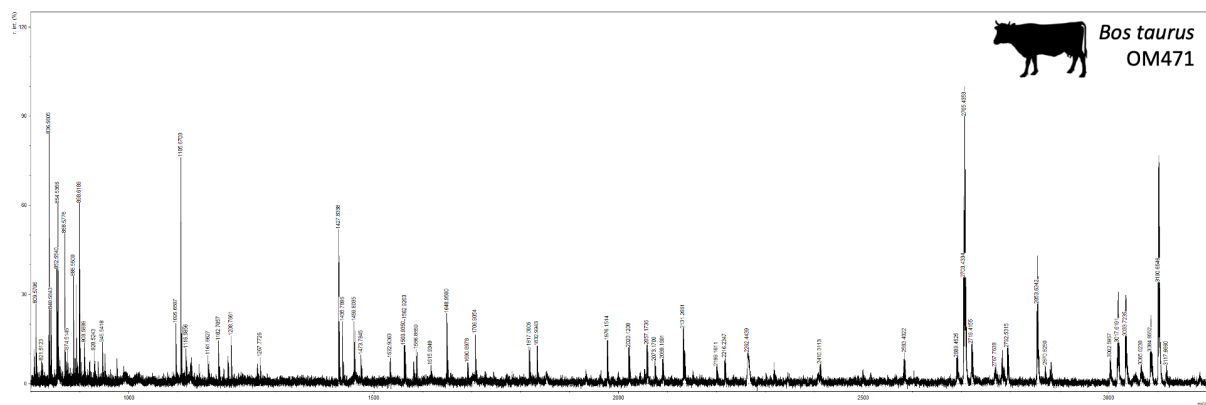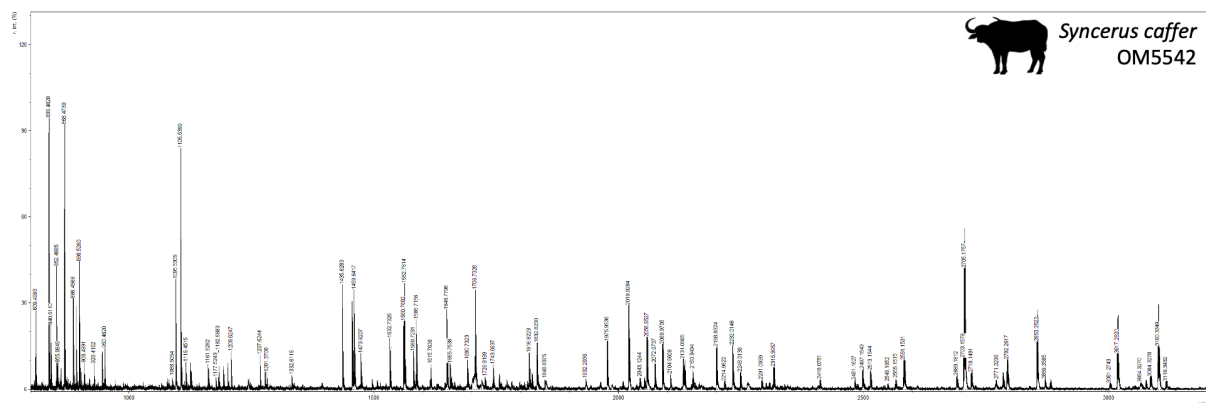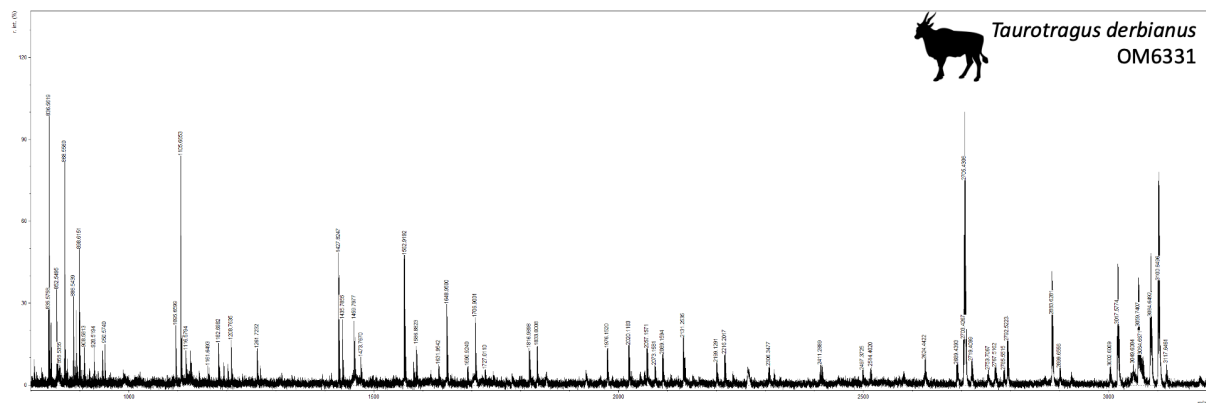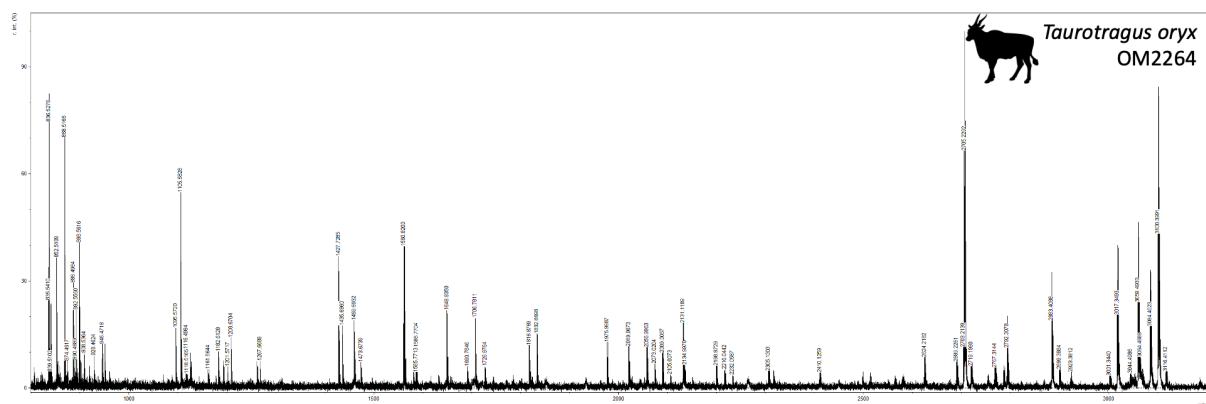

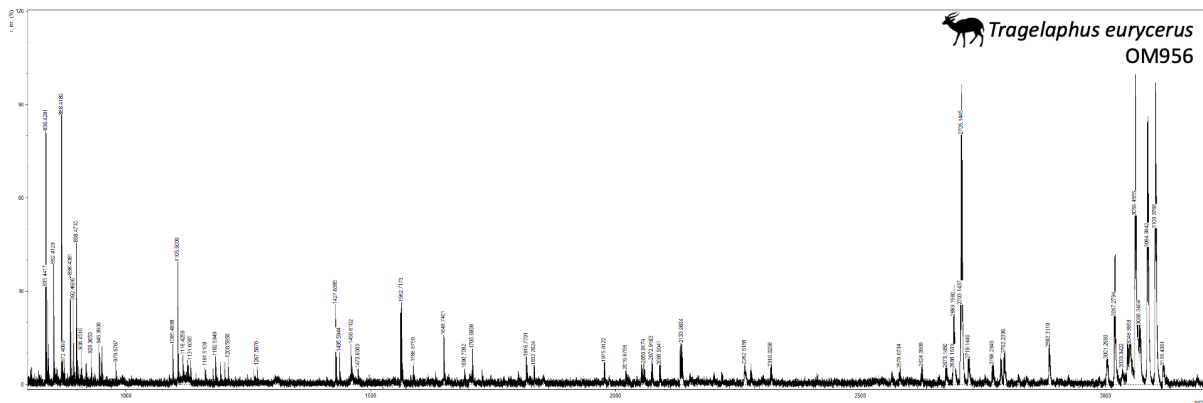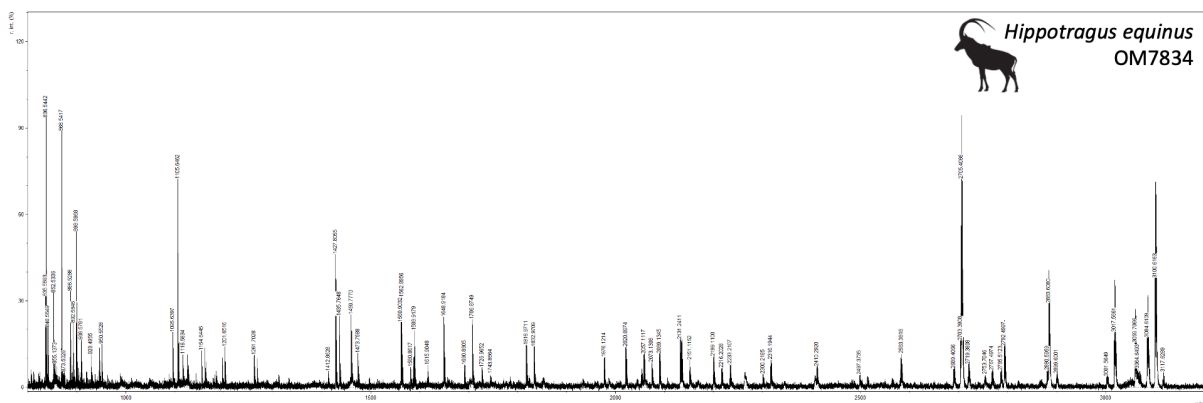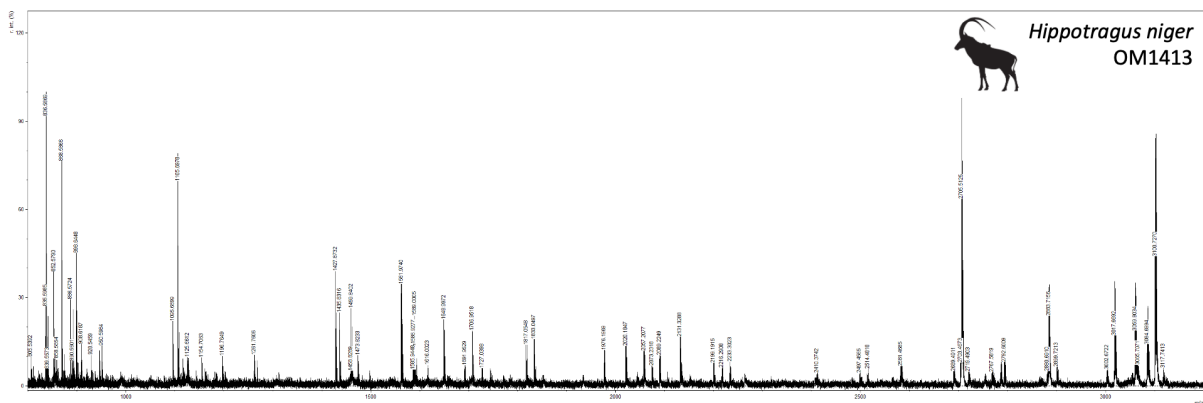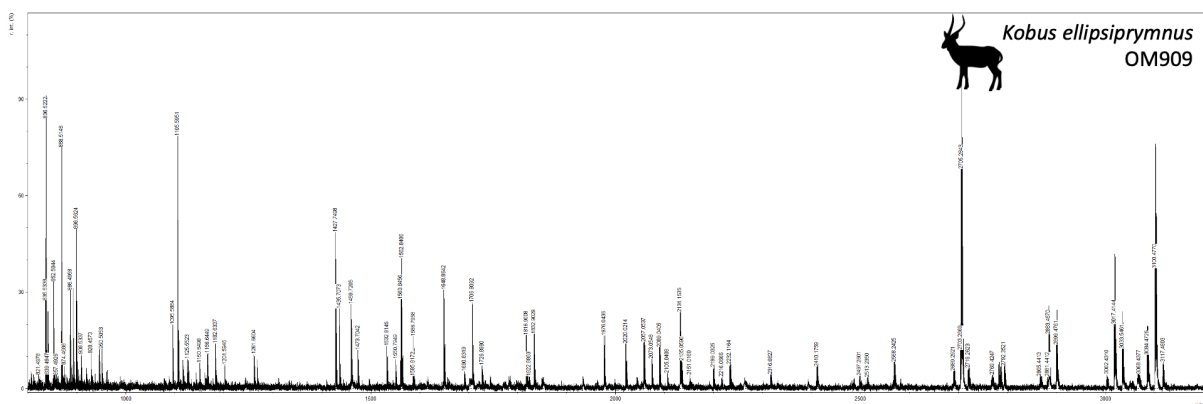



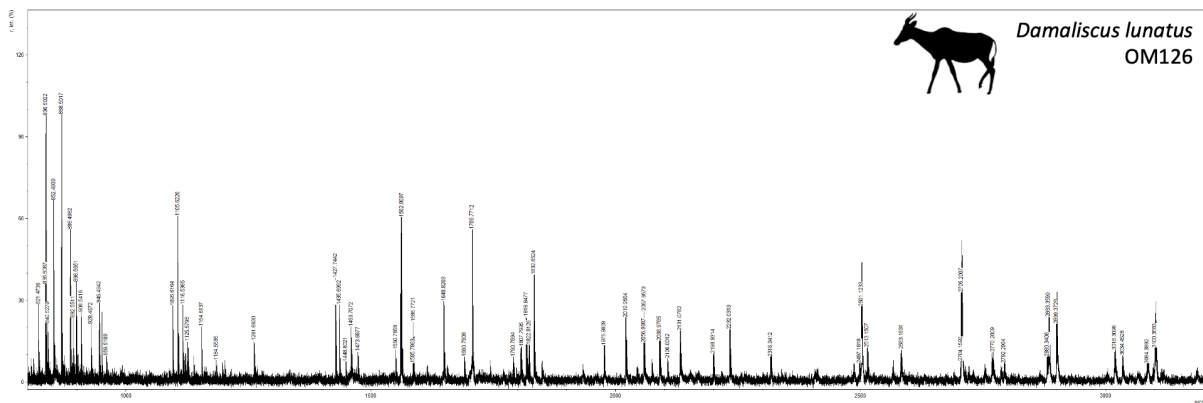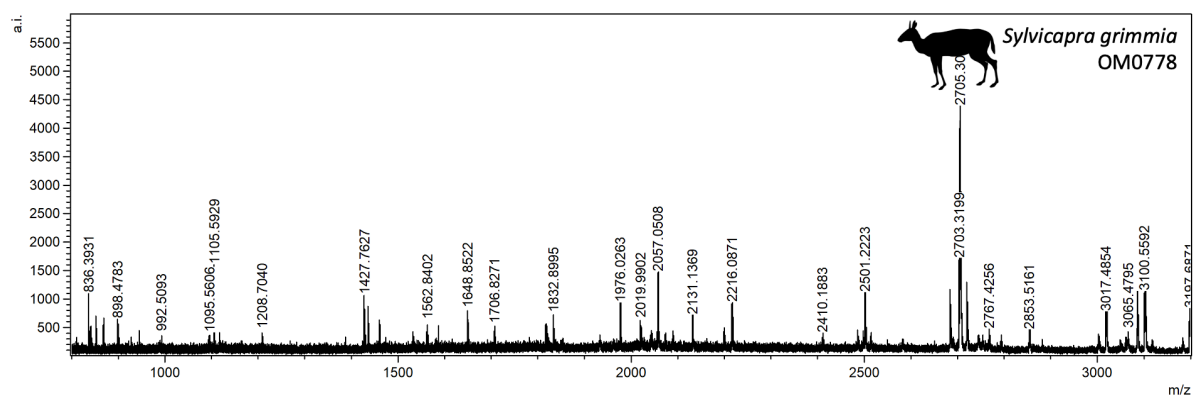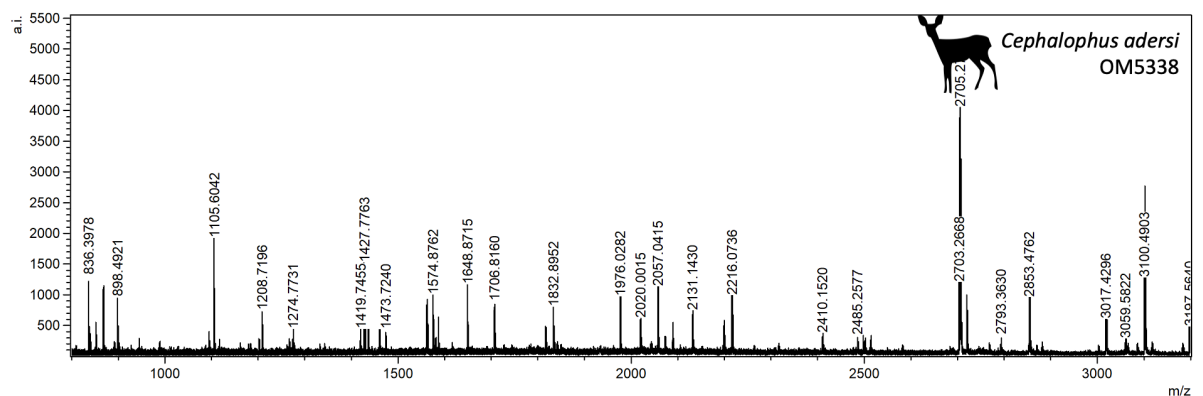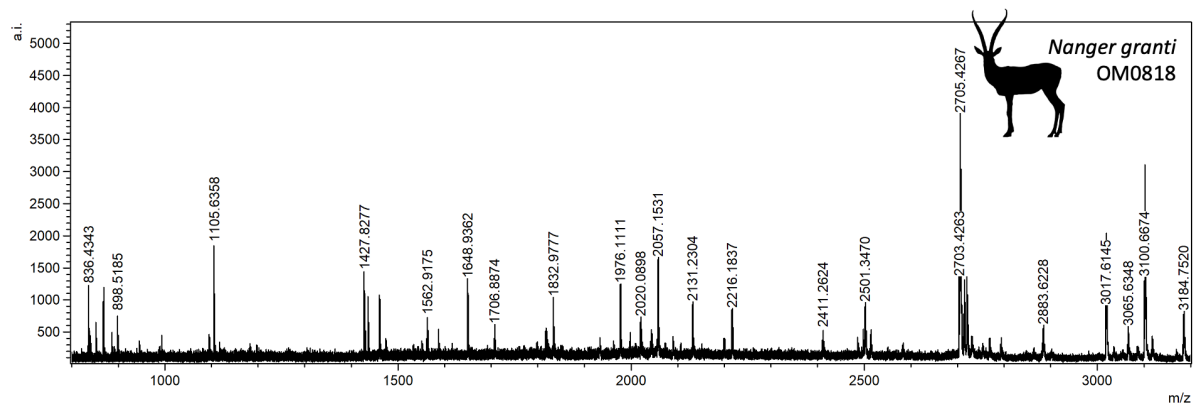

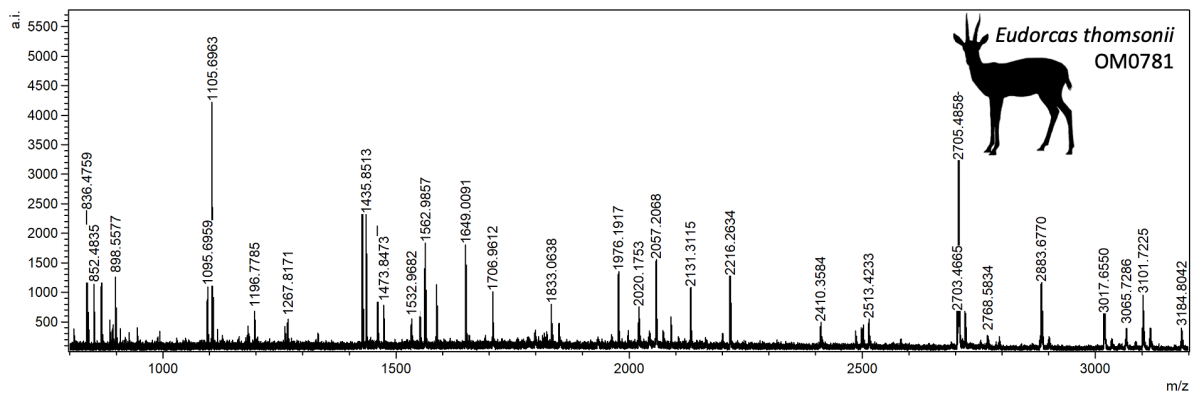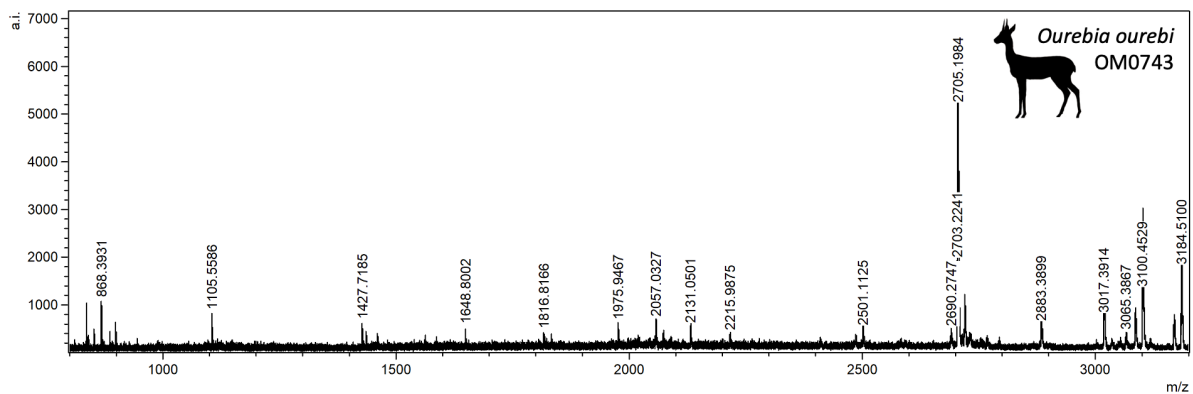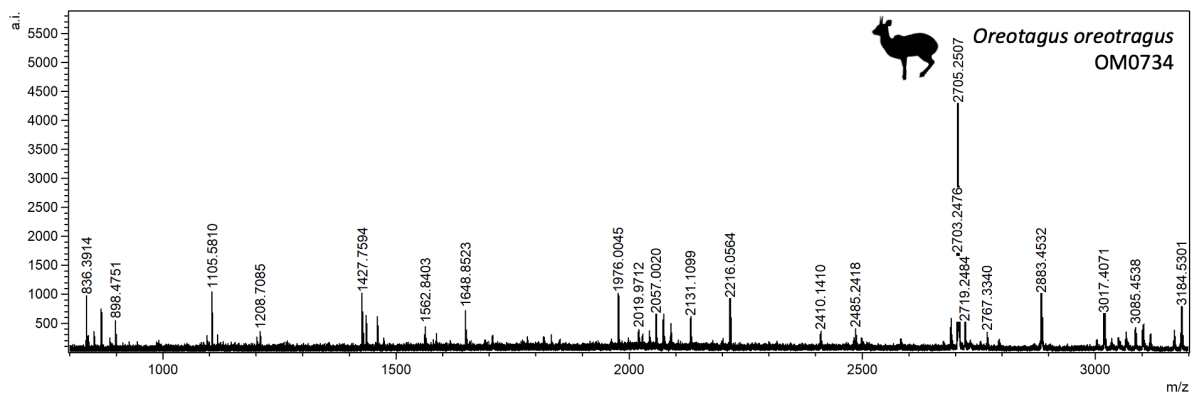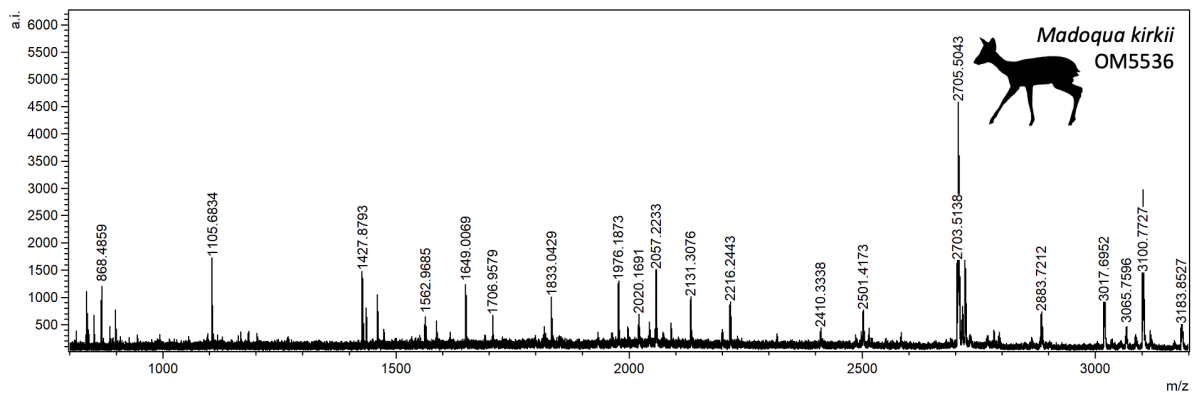

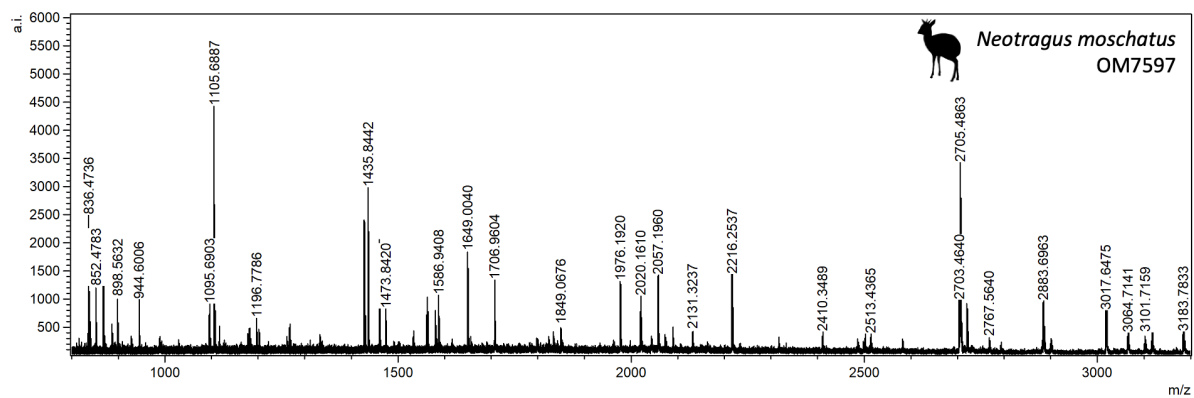

Supplement: S1 (10.1371/journal.pone.0251061.s001) [file journal.pone.0251061.s001]
